# Supplementary material
Source: ML conference proceedings conference paper supplement (https://aclanthology.org/2022.emnlp-main.91)
Supplement: note [file 2022.emnlp-main.91.note.pdf]

# Changes

## 1 General response

Although we are not conditionally accepted that there are no ethical concerns to our paper, we would like to summarize our changes and thank all reviewers for the in-depth comments, which are valuable for us to further improve our submission.

- According to comment of Reviewer 1, we revised lines 340/341 with: Besides FWSVD (Hsu et al., 2021) and our proposed TFWSVD.
- According to comment of Reviewer 1, we added more explanations to Equation (10).
- According to comment of Reviewer 1, we changed  $S$  into  $\Sigma$  in Equation (7).
- According to comment of Reviewer 3, we corrected line 383 - line 384 into: distil-BERT has strong performance on CoLA but is weak at STSB.
- According to comment of Reviewer 3, we changed the content line 374 - line 384 to avoid the description of “beating”.
- According to comment of Reviewer 3, we included  $r$  in the matrix in Equation (2).
